# Supplementary material
Source: Springer Nature journal article supplement (https://www.springermedizin.de/resource/supplementary/12958_2009_514_MOESM3_ESM.pdf/9568186)

**Specific Bound  
(% of Vehicle)**

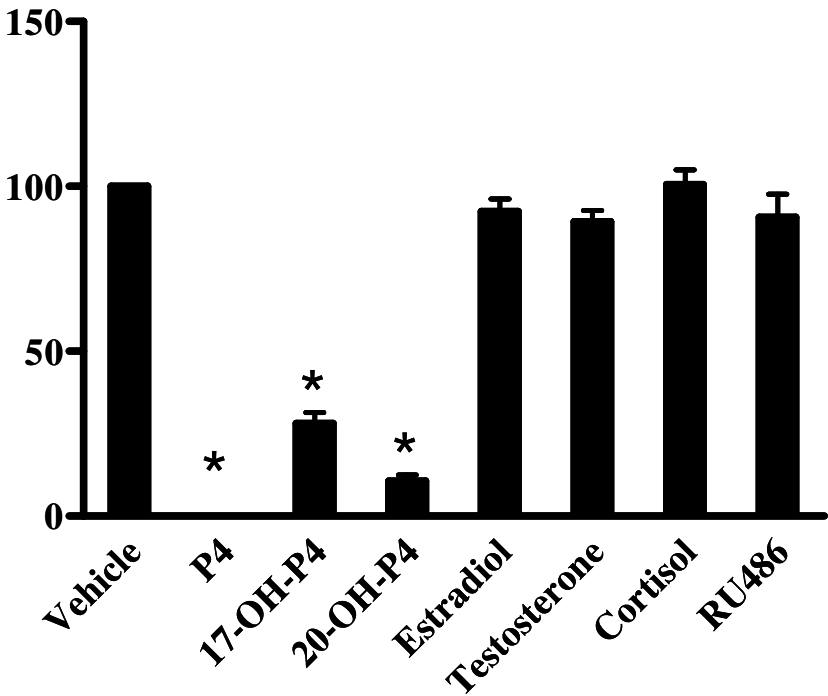

Supplement: MOESM3 [file 9568186]
